# Supplementary material for: Sequestration of nanoparticles by an EPS matrix reduces the particle-specific bactericidal activity
Source: PubMed Central journal article supplement (PMC4809067; doi:10.1038/srep21379), 2016-02-09
Supplement: srep21379-s1.pdf [file srep21379-s1.pdf]

1 **Supplementary information:**

2

3 **Sequestration of nanoparticles by an EPS matrix reduces the**  
4 **particle-specific bactericidal activity**

5

6 Qian Wang<sup>1,3</sup>, Fuxing Kang<sup>2,\*</sup>, Yanzheng Gao<sup>2,\*</sup>, Xuewei Mao<sup>2</sup>, Xiaojie Hu<sup>2</sup>

7

8 <sup>1</sup> State Key Laboratory of Lake Science and Environment, Nanjing Institute of Geography and  
9 Limnology, Chinese Academy of Sciences, Jiangsu 210008, China

10 <sup>2</sup> Institute of Organic Contaminant Control and Soil Remediation/College of Resources and  
11 Environmental Sciences, Nanjing Agricultural University, Jiangsu 210095, China

12 <sup>3</sup> School of Earth Sciences and Engineering, Nanjing University, Jiangsu 210046, China

13

14

15

16

17

18

19 \*Correspondence and requests for materials should be addressed to F.X.K (kangfuxing@126.com)

20 and Y.Z.G. (gaoyanzheng@njau.edu.cn)

21

22 Manuscript prepared for *Scientific Reports*

23

October 27, 2015

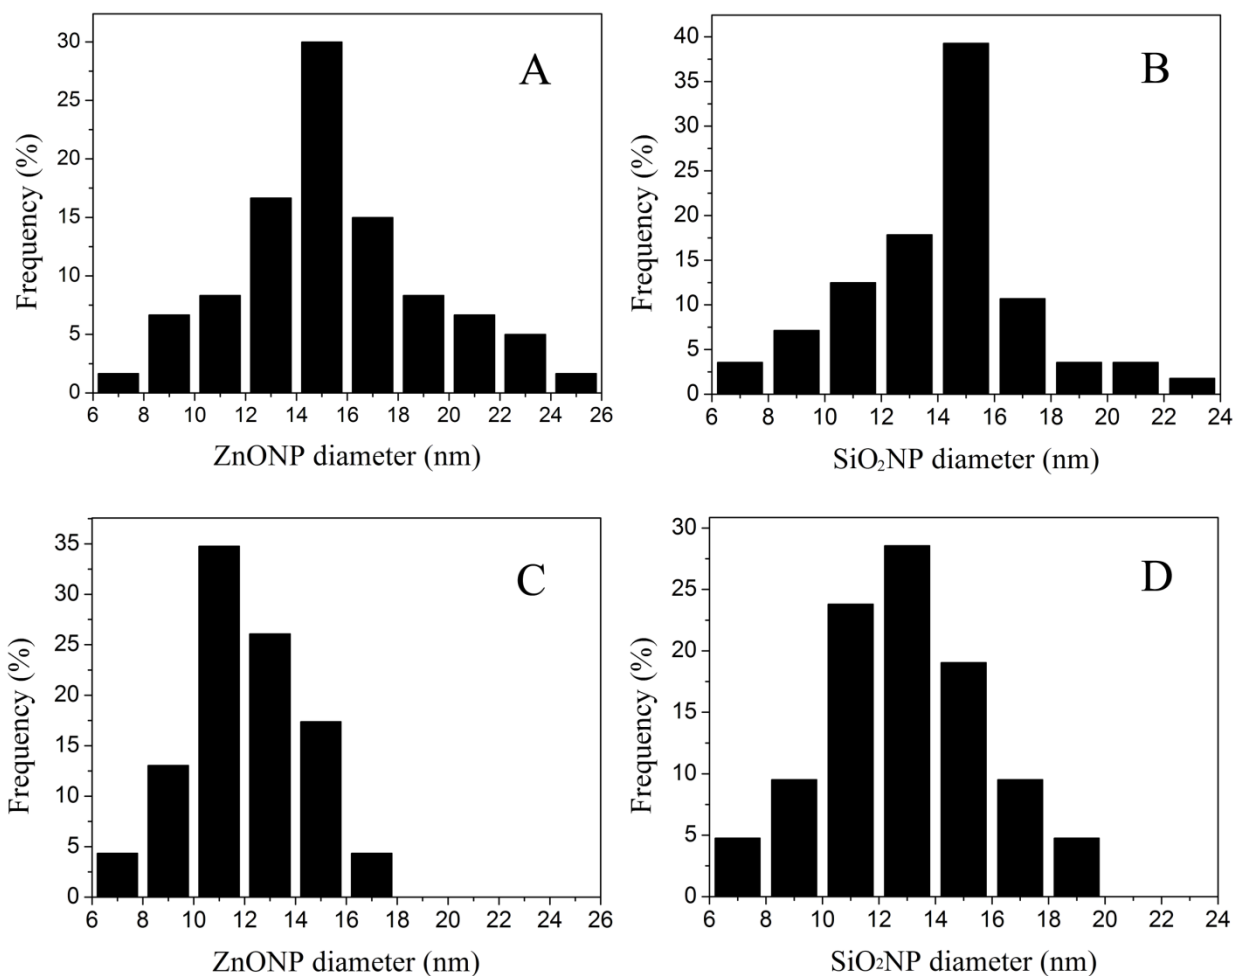

24

25 **Figure | S1 Diameter of ZnONPs and SiO<sub>2</sub>NPs after reaction of with *E. coli*.** (A): Pristine  
 26 ZnONPs; (B): SiO<sub>2</sub>NPs; (C): ZnONPs after reaction with *E. coli*; (D): SiO<sub>2</sub>NPs after reaction with  
 27 *E. coli*. The data were calculated on the basis of Figure 4A and B in text and Figure S3A and B of  
 28 the Supplementary Information.

29

30

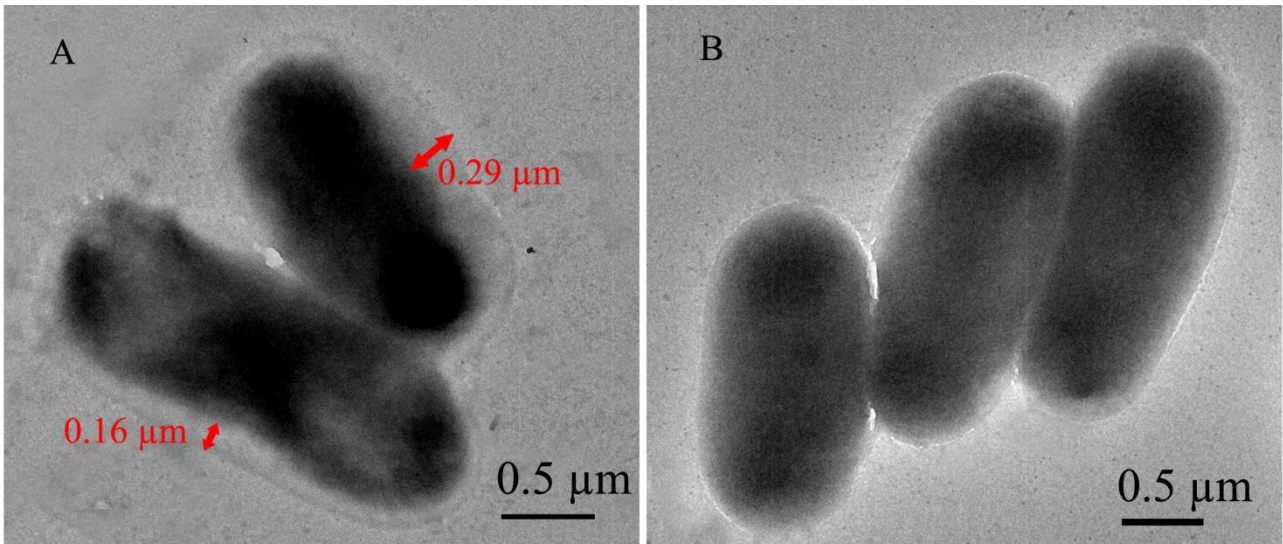

31

32 **Figure | S2 EPS permeable barrier on *E. coli* surface before (A) and after EPS manipulation**

33 **(B).** Red arrows present the thickness of EPS permeable barrier.

34

35

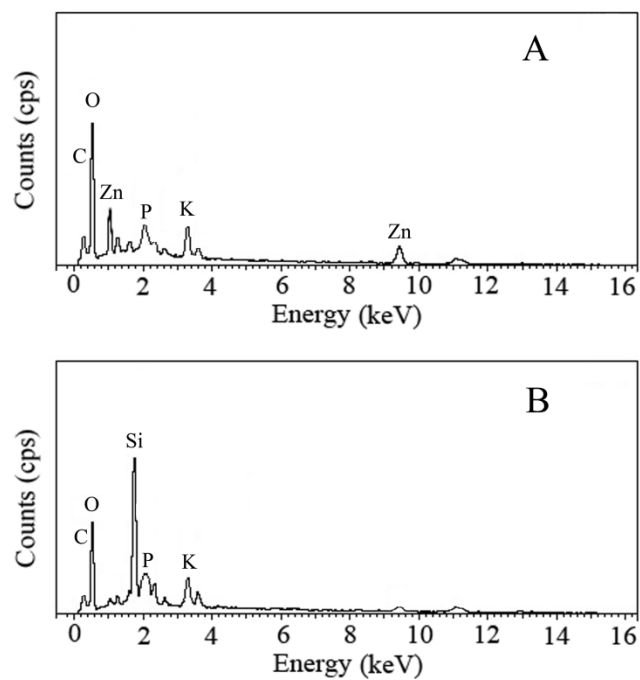

36

37 **Figure | S3 Energy dispersive spectroscopy(EDS) analysis of ZnONPs (A) and SiO<sub>2</sub>NPs (B) on**

38 **surface of *E. coli*.** The C, P, and K signals in the EDS images are from the EPS on surface of *E.*

39 *coli*.

40

41

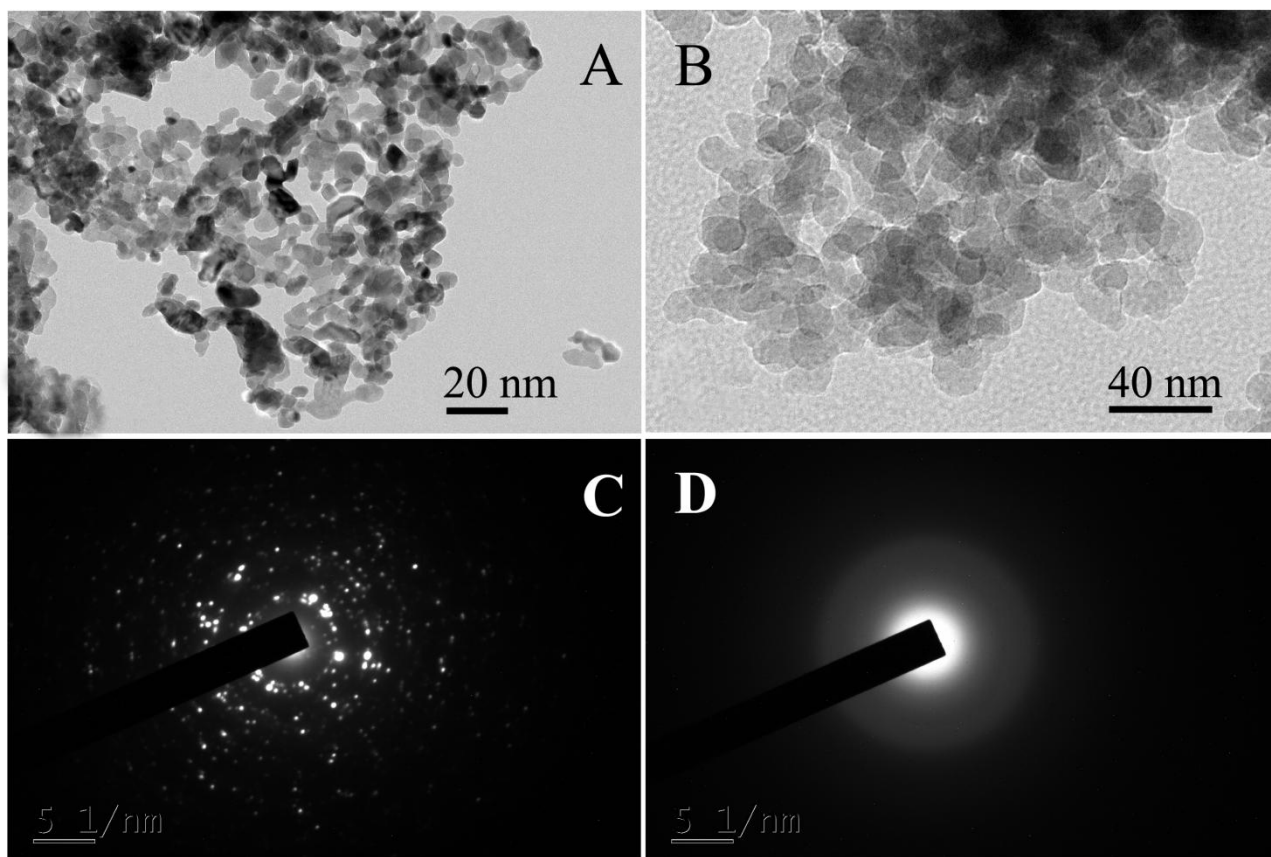

47

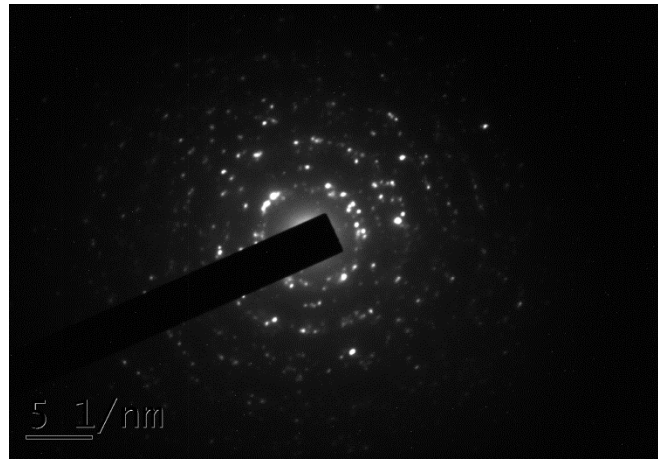

48

49 **Figure | S5 SAED image of ZnONPs on *E. coli* surface.**

50

51

52

53

54

55

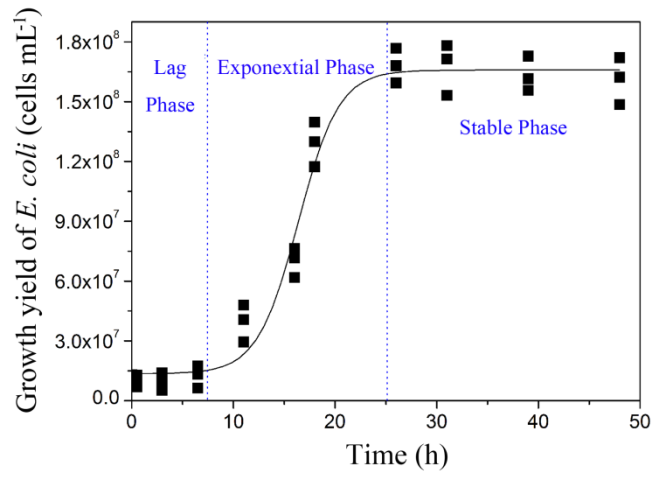

56

57 **Figure | S6 The growth curve of *E. coli* in LB medium for 48 h at 37 °C.**

58

59

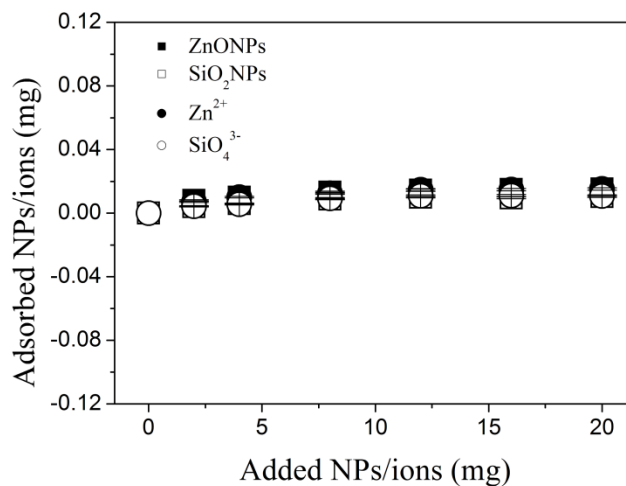

60

61 **Figure | S7 Negligible effect of dialysis membrane on NPs and ions.** The reaction solutions were  
 62 40 mL. The dialysis bag with a with molecular weight cut off 3500 (3-cm length) was used to act as  
 63 the adsorbent. The aqueous NP and ion solutions (40 mL) were used in this sorption experiment,  
 64 and no LB medium was used. The batch experiments were performed at 37 °C for 16 h.

65

66



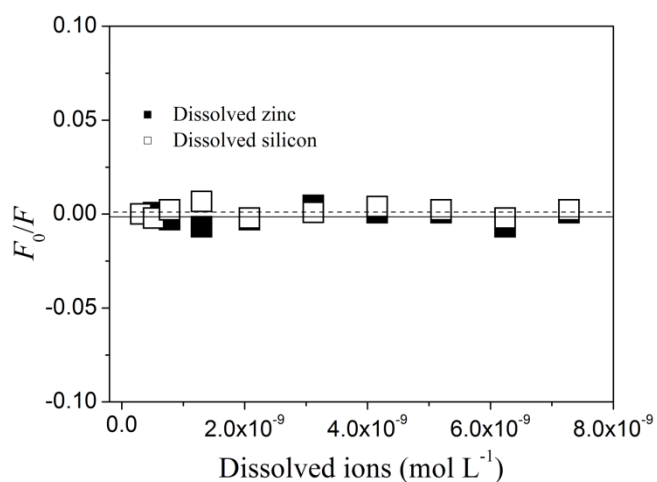

68

69 **Figure | S8 Negligible fluorescence quenching resulted from ZnONP and SiO<sub>2</sub>NP dissolution.**

70 Basing on slight dissolution of NPs, equivalent Zn<sup>2+</sup> and SiO<sub>3</sub><sup>2-</sup> ions were used to titrate the EPS  
 71 (0.5 mg L<sup>-1</sup>, dry weight basis), it was not observed the obvious fluorescence quenching. This  
 72 indicated that fluorescence quenching of EPS during the titration could be attributed to NP, rather  
 73 than dissolving zinc or silicon.
